# Supplementary material for: Validation and Cultural Adaptation of the Parent Attitudes about Childhood Vaccines (PACV) Questionnaire in Arabic Language Widely Spoken in a Region with a High Prevalence of COVID-19 Vaccine Hesitancy
Source: Trop Med Infect Dis. 2022 Sep 8;7(9):234. doi: 10.3390/tropicalmed7090234 (PMC9504773; doi:10.3390/tropicalmed7090234)
Supplement: Supplementary file 1 [file tropicalmed-07-00234-s001.zip]

Archive with 4 entries (4 files):
- Supplementary_S1.pdf
- Supplementary_S2_Backward_translation.pdf
- Supplementary_S3_Result_of_cognitive_interview.pdf
- Supplementary_S4_Data_collection_tool.pdf
