# Supplementary material for: Validation and Cultural Adaptation of the Parent Attitudes about Childhood Vaccines (PACV) Questionnaire in Arabic Language Widely Spoken in a Region with a High Prevalence of COVID-19 Vaccine Hesitancy
Source: Trop Med Infect Dis. 2022 Sep 8;7(9):234. doi: 10.3390/tropicalmed7090234 (PMC9504773; doi:10.3390/tropicalmed7090234)
Supplement: Supplementary file 1 [file tropicalmed-07-00234-s001.zip › Supplementary_S1.pdf]

## Supplementary S1

### Parent Attitudes about Childhood Vaccines (PACV) Scale in Arabic Language

- (1) هل سبق لك في أي وقت أن أجلت تطعيم طفلك لأسباب غير المرض أو الحساسية؟
- (2) هل سبق لك أن قررت الامتناع عن تطعيم طفلك لأسباب غير المرض أو الحساسية
- (3) إلى أي مدى أنت متأكد أن الالتزام بجرعات التطعيم الموصى بها مفيدة بالنسبة لطفلك
- (4) يتلقى الأطفال عدد أكبر من جرعات التطعيم اللازمة لهم
- (5) أعتقد أن التطعيمات تقي من الأمراض الشديدة
- (6) من الأفضل لطفلي أن يكتسب مناعة عن طريق الإصابة بالمرض بدلا من أخذ التطعيم.
- (7) من الأفضل أن يحصل الأطفال على عدد قليل من جرعات التطعيم في نفس الوقت.
- (8) إلى أي مدى تشعر بالقلق من أن يسبب التطعيم عرض جانبي خطير لطفلك؟
- (9) إلى أي مدى تشعر بالقلق أن تكون إحدى تطعيمات الأطفال غير آمنة؟
- (10) إلى أي مدى تشعر بالقلق أن التطعيم لن يقي من المرض؟
- (11) إذا رزقت بطفل في الوقت الحالي هل ترغب بأن يتلقى كل التطعيمات الموصى بها؟
- (12) عموما، إلى أي درجة تعتبر نفسك متردد بشأن تطعيمات الأطفال؟
- (13) أثق بالمعلومات التي اتلقاها عن التطعيمات.
- (14) أنا قادر على مناقشة مخاوفي الخاصة بالتطعيم مع طبيب الأطفال.
- (15) اجمالا، إلى أي مدى تثق في طبيب الأطفال ؟

**In order to reuse this questionnaire, permission must be obtained from the corresponding authors: Ramy Mohamed Ghazy, E-mail: [ramy\\_ghazy@alexu.edu.eg](mailto:ramy_ghazy@alexu.edu.eg); Malik Sallam, E-mail: [malik.sallam@ju.edu.jo](mailto:malik.sallam@ju.edu.jo)**
