# Supplementary material for: Validation and Cultural Adaptation of the Parent Attitudes about Childhood Vaccines (PACV) Questionnaire in Arabic Language Widely Spoken in a Region with a High Prevalence of COVID-19 Vaccine Hesitancy
Source: Trop Med Infect Dis. 2022 Sep 8;7(9):234. doi: 10.3390/tropicalmed7090234 (PMC9504773; doi:10.3390/tropicalmed7090234)
Supplement: Supplementary file 1 [file tropicalmed-07-00234-s001.zip › Supplementary_S3_Result_of_cognitive_interview.pdf]

## Questions we tested

- (1) هل سبق لك في أي وقت أن أجلت تطعيم طفلك لأسباب غير المرض أو الحساسية؟
- (2) هل سبق لك أن قررت الامتناع عن تطعيم طفلك لأسباب غير المرض أو الحساسية
- (3) الى أي مدى أنت متأكد أن الالتزام بالجرعات الموصى بها مفيد بالنسبة لطفلك
- (4) يتلقى الأطفال عدد أكبر من الجرعات (**جرعات التطعيم**) اللازمة لهم
- (5) أعتقد أن التطعيمات تقي من الأمراض الشديدة
- (6) من الأفضل لطفلي أن يكتسب مناعة عن طريق الإصابة بالمرض عن (**بدلاً من**) أخذ التطعيم.
- (7) من الأفضل أن يحصل الأطفال على عدد قليل من التطعيمات (**جرعات التطعيم**) في نفس الوقت.
- (8) الى أي مدى تشعر بالقلق من أن يسبب التطعيم عرض جانبي خطير لطفلك؟
- (9) الى أي مدى تشعر بالقلق أن تكون إحدى تطعيمات الاطفال غير امنة؟
- (10) الى أن مدى تشعر بالقلق أن التطعيم لن يقي من المرض؟
- (11) اذا رزقت بطفل في الوقت الحالي هل ترغب بأن يتلقى كل التطعيمات الموصى بها؟
- (12) عموماً، الى أي درجة تعتبر نفسك متردد بشأن تطعيمات الأطفال؟
- (13) أثق بالمعلومات التي اتلقاها عن التطعيمات.
- (14) أنا قادر على مناقشة مخاوفي الخاصة بالتطعيم مع طبيب طفلي (**طبيب الاطفال**) .
- (15) اجمالاً، الى أي مدى تثق في طبيب طفلك (**طبيب الاطفال**) ؟

## Pre-testing and cognitive interview

During cognitive interview, we recruited 16 participants (5 physicians, 3 nurses and 8 ordinary people). They were interviewed to determine if they got what is meant by each question.

We reported that:

- 9 participants are fully understanding the forward translated questions
- while 2 participants cannot understand what is meant by question number 4. “جرعات التطعيم”
- 1 participant commented on question 6 “بدلاً من اخذ التطعيم”
- 1 participant cannot understand question 7. “جرعات التطعيم”
- 3 participants commented on question 14.

(They said ‘they have no concerns at earlier questions, so they have no issues to discuss with pediatrician.’)

- 5 participants commented on question 15 as they have no pediatrician for their children. “طبيب الاطفال”
