# Supplementary material for: Validation and Cultural Adaptation of the Parent Attitudes about Childhood Vaccines (PACV) Questionnaire in Arabic Language Widely Spoken in a Region with a High Prevalence of COVID-19 Vaccine Hesitancy
Source: Trop Med Infect Dis. 2022 Sep 8;7(9):234. doi: 10.3390/tropicalmed7090234 (PMC9504773; doi:10.3390/tropicalmed7090234)
Supplement: Supplementary file 1 [file tropicalmed-07-00234-s001.zip › Supplementary_S4_Data_collection_tool.pdf]

مسح لتقييم مدى تقبل الآباء لتلقي لقاحات (تطعيمات) كورونا-19 بين أبنائهم -----  
----- يهديكم فريق الدراسة أطيب تحية، ويدعوكم فضلا للمشاركة في ملء الاستبيان  
المرفق. تهدف هذه الدراسة إلى تقييم مدى تقبل الآباء لتلقي لقاحات كورونا-19 بين أبنائهم الذين تتراوح  
أعمارهم بين 5 و17 سنة. ولمزيد من المعلومات لا تتردد في التواصل مع فريق البحث على الإيميل التالي:  
[pacv.egypt@gmail.com](mailto:pacv.egypt@gmail.com) هذا الاستبيان لن يطلب أي معلومات تدل على هويتك ولن يتم استخدام  
بياناتك سوى لغرض البحث.

---

\* Required

#### Untitled Section

1. \* هل لديك أطفال تتراوح أعمارهم بين 5 سنوات إلى 17 سنة؟

Mark only one oval.

☐ نعم

☐ لا

2. \* ما هو عدد أطفالك الذين تتراوح أعمارهم بين 5 و 17 سنة؟

Mark only one oval.

☐ 1

☐ 2 Skip to question 42

☐ 3 Skip to question 88

☐ 4 Skip to question 141

(البيانات الشخصية والصحية) خاصة بالآباء والأوصياء على الأطفال

## 3. \* أذكر المحافظة التي تعيش بها

Mark only one oval.

- ☐ الإسكندرية
- ☐ الإسماعيلية
- ☐ أسوان
- ☐ أسيوط
- ☐ الأقصر
- ☐ البحر الأحمر
- ☐ البحيرة
- ☐ بني سويف
- ☐ بورسعيد
- ☐ جنوب سيناء
- ☐ الجيزة
- ☐ الدقهلية
- ☐ دمياط
- ☐ سوهاج
- ☐ السويس
- ☐ الشرقية
- ☐ شمال سيناء
- ☐ الغربية
- ☐ الفيوم
- ☐ القاهرة
- ☐ القليوبية
- ☐ قنا

- ☐ كفر الشيخ
- ☐ مطروح
- ☐ المنوفية
- ☐ المنيا
- ☐ الوادي الجديد

4. \* الجنس/ النوع

Mark only one oval.

- ☐ ذكر
- ☐ أنثى

5. \* العمر

Mark only one oval.

- ☐ عام 18-29
- ☐ سنة 30-39
- ☐ سنة 40-49
- ☐ سنة 50-59
- ☐ أكثر من 60 سنة

## 6. \* صلة القرابة للطفل

*Mark only one oval.*

- ☐ الأم
- ☐ الأب
- ☐ الجد/الجدة
- ☐ العم/ة أو الخال/ة
- ☐ غير ذلك

## 7. \* مستوى التعليم

*Mark only one oval.*

- ☐ أمي لا يقرأ ولا يكتب
- ☐ يقرأ ويكتب
- ☐ ابتدائي
- ☐ اعدادي
- ☐ ثانوي
- ☐ جامعي
- ☐ دراسات عليا

## 8. \* محل العمل

*Mark only one oval.*☐ حكومي☐ خاص☐ لأعمل

## 9. \* نوع العمل

*Mark only one oval.*☐ أعمل من خلال المنزل☐ (أعمل جزئياً) أذهب الي العمل 3 أو 4 مرات في الأسبوع☐ أذهب إلي العمل يوميا☐ لأعمل

## 10. \* هل تعمل بالمجال الصحي؟

*Mark only one oval.*☐ نعم☐ لا

11. \* هل لديك تأمين صحي؟

Mark only one oval.

☐ تأمين صحي حكومي

☐ تأمين صحي خاص

☐ بدون تأمين صحي

12. \* الدخل الشهري

Mark only one oval.

☐ لا يكفي ويستدين ولا يستطيع الوفاء بالدين

☐ لا يكفي ويستدين ويستطيع الوفاء بالدين

☐ يكفي

☐ يكفي ويدخر

13. \* هل يعيش أحد الوالدين أو الأقارب من كبار السن معك في نفس المنزل؟

Mark only one oval.

☐ نعم

☐ لا

14. \* ما هو عدد الأفراد الذين يعيشون بداخل منزلك؟

Mark only one oval.

- ☐ فردين
- ☐ أفراد 3
- ☐ أفراد 4
- ☐ أفراد 5
- ☐ أكثر من 5 أفراد

15. \* هل تأكدت إصابتك بفيروس كورونا-19 من قبل؟

Mark only one oval.

- ☐ نعم
- ☐ لا
- ☐ غير متأكد

16. \* ما هو موقفك من لقاح كورونا-19؟

Mark only one oval.

- ☐ (أرفض تلقي اللقاح (التطعيم)
- ☐ تلقيت الجرعة الأولى وبانتظار الجرعة الثانية
- ☐ تلقيت الجرعة الأولى ولن أتلقى الجرعة الثانية
- ☐ تلقيت الجرعة الأولى والثانية وفي انتظار الجرعة التنشيطية
- ☐ تلقيت الجرعة الأولى والثانية ولن أكمل الجرعة التنشيطية
- ☐ أتممت الجرعات (الأولى والثانية والتنشيطية)
- ☐ أوافق علي تلقي اللقاح وبانتظار تلقي الجرعات

17. \* ما هو سبب عدم استكمال جرعات اللقاح المضاد لفيروس كورونا-19؟

Check all that apply.

- ☐ لأن التطعيم غير متوفر
- ☐ لن استكمل الجرعات
- ☐ لأن ميعاد الجرعة الثانية من اللقاح لم يحن موعده بعد
- ☐ لا ينطبق

Other: ☐ \_\_\_\_\_

18. \* إن كنت تعاني من أمراض مزمنة, حدد تلك الأمراض

Check all that apply.

- ☐ لا أعاني من أمراض مزمنة
- ☐ ضغط
- ☐ سكر
- ☐ قلب
- ☐ أمراض صدرية
- ☐ أمراض في الكلى والكبد
- ☐ أمراض روماتيزمية ومناعية
- ☐ أمراض نفسية وعصبية
- ☐ إعاقة حركية
- ☐ فقدان جزئي للسمع والبصر

Other: ☐ \_\_\_\_\_

بيانات خاصة بطفلك

19. \* ما هو عمر طفلك؟

\_\_\_\_\_

20. \* ما هو نوع/جنس طفلك؟

Mark only one oval.

☐ ذكر

☐ أنثى

21. \* هل سبق وأن تم تشخيص طفلك بالإصابة بفيروس كورونا-19؟

Mark only one oval.

☐ نعم

☐ لا

☐ غير متأكد

22. \* (هل يعاني طفلك من أي أمراض مزمنة؟ (حدد تلك الأمراض

Check all that apply.

- ☐ لا يعاني أبنائي من أي أمراض مزمنة
- ☐ سكر
- ☐ ضغط
- ☐ قلب
- ☐ أمراض صدرية
- ☐ أمراض الكلى والكبد
- ☐ أمراض روماتيزمية ومناعية
- ☐ أمراض نفسية وعصبية
- ☐ إعاقات حركية
- ☐ فقدان جزئي للسمع أو البصر

23. \* هل تلقى طفلك التطعيمات (اللقاحات) الإلزامية للأطفال من قبل وزارة الصحة المصرية؟

Mark only one oval.

- ☐ نعم
- ☐ لا
- ☐ غير متأكد

24. \* هل تلقى طفلك تطعيم الانفلونزا الموسمية في خلال السنتين الماضيتين؟

Mark only one oval.

☐ نعم

☐ لا

☐ غير متأكد

25. \* ما هو موقفك تجاه تطعيم طفلك بتطعيم (لقاح) الكورونا-19؟

Mark only one oval.

☐ بالفعل تلقى طفلي تطعيم (لقاح) الكورونا-19

☐ أوافق على تطعيم طفلي، ولكن تطعيم (لقاح) الكورونا-19 غير متوفر

☐ أرفض تطعيم طفلي بتطعيم (لقاح) كورونا-19

26. \* إذا أُتيح لك الاختيار، هل ترغب في تطعيم طفلك بنوع محدد من اللقاحات المتوفرة ضد فيروس كورونا-19؟

Check all that apply.

- ☐ سينوفارم
- ☐ سينوفاك
- ☐ استرازينيكا
- ☐ سبوتنيك
- ☐ جونسون اند جونسون
- ☐ فايزر
- ☐ مودرنا
- ☐ أرفض تطعيم طفلي
- ☐ لا أعلم

الرجاء اختيار إجابة واحدة

مقياس اتجاهات الآباء عن التطعيمات لأطفالهم

27. \* هل سبق لك في أي وقت أن أجلت تطعيم طفلك لأسباب غير المرض أو الحساسية؟

Mark only one oval.

- ☐ نعم
- ☐ لا
- ☐ لا أعلم

28. \* هل سبق لك أن قررت الامتناع عن تطعيم طفلك لأسباب غير المرض أو الحساسية؟

Mark only one oval.

- ☐ نعم
- ☐ لا
- ☐ لا أعلم

29. \* إلى أي مدى أنت متأكد أن الالتزام بجرعات التطعيم الموصي بها مفيدة بالنسبة لطفلك

Mark only one oval.

|            | 1                     | 2                     | 3                     | 4                     | 5                     | 6                     | 7                     | 8                     | 9                     | 10                    |                       |
|------------|-----------------------|-----------------------|-----------------------|-----------------------|-----------------------|-----------------------|-----------------------|-----------------------|-----------------------|-----------------------|-----------------------|
| متأكد بشدة | <input type="radio"/> | غير متأكد علي الإطلاق |

30. \* يتلقى الأطفال عدد أكبر من جرعات التطعيم اللازمة لهم

Mark only one oval.

- ☐ أوافق بشدة
- ☐ أوافق
- ☐ غير متأكد
- ☐ لا أوافق
- ☐ لا أوافق بشدة

31. \* أعتقد أن التطعيمات تقي من الأمراض الشديدة

Mark only one oval.

- ☐ أوافق بشدة
- ☐ أوافق
- ☐ غير متأكد
- ☐ لا أوافق
- ☐ لا أوافق بشدة

32. \* من الأفضل لطفلي أن يكتسب مناعة عن طريق الإصابة بالمرض بدلاً من أخذ التطعيم

Mark only one oval.

- ☐ أوافق بشدة
- ☐ أوافق
- ☐ غير متأكد
- ☐ لا أوافق
- ☐ لا أوافق بشدة

33. \* من الأفضل أن يحصل الأطفال على عدد قليل من جرعات التطعيم في نفس الوقت

Mark only one oval.

- ☐ أوافق بشدة
- ☐ أوافق
- ☐ غير متأكد
- ☐ لا أوافق
- ☐ لا أوافق بشدة

34. \* إلى أي مدى تشعر بالقلق من أن يسبب التطعيم عرض جانبي خطير لطفلك؟

Mark only one oval.

- ☐ أنا لست قلق أبدا تجاه ذلك
- ☐ أنا لست قلق تجاه ذلك
- ☐ غير متأكد
- ☐ أنا قلق قليلا تجاه ذلك
- ☐ أنا قلق كثيرا تجاه ذلك

35. \* إلى أي مدى تشعر بالقلق أن تكون احدى تطعيمات الاطفال غير امنة؟

Mark only one oval.

- ☐ أنا لست قلق أبدا تجاه ذلك
- ☐ أنا لست قلق تجاه ذلك
- ☐ أنا قلق قليلا تجاه ذلك
- ☐ أنا قلق كثيرا تجاه ذلك

36. \* إلى أي مدى تشعر بالقلق أن التطعيم لن يقي من المرض؟

Mark only one oval.

- ☐ أنا لست قلق أبدا تجاه ذلك
- ☐ أنا لست قلق تجاه ذلك
- ☐ غير متأكد
- ☐ أنا قلق قليلا تجاه ذلك
- ☐ أنا قلق كثيرا تجاه ذلك

37. \* إذا رزقت بطفل في الوقت الحالي هل ترغب بأن يتلقى كل التطعيمات الموصى بها؟

Mark only one oval.

☐ نعم

☐ لا

☐ لا أعلم

38. \* عموماً، الى أي درجة تعتبر نفسك متردد بشأن تطعيمات الأطفال؟

Mark only one oval.

☐ لست متردد أبدا

☐ لست متردد

☐ غير متأكد

☐ متردد

☐ متردد جداً

39. \* أثق بالمعلومات التي اتلقاها عن التطعيمات

Mark only one oval.

- ☐ أوافق بشدة
- ☐ أوافق
- ☐ غير متأكد
- ☐ لا أوافق
- ☐ لا أوافق بشدة

40. \* أنا قادر على مناقشة مخاوفي الخاصة بالتطعيم مع طبيب طفلي

Mark only one oval.

- ☐ أوافق بشدة
- ☐ أوافق
- ☐ غير متأكد
- ☐ لا أوافق
- ☐ لا أوافق بشدة

41. \* إجمالاً، إلى أي مدى تثق في طبيب طفلك؟

Mark only one oval.

|          | 1                     | 2                     | 3                     | 4                     | 5                     | 6                     | 7                     | 8                     | 9                     | 10                    |                    |
|----------|-----------------------|-----------------------|-----------------------|-----------------------|-----------------------|-----------------------|-----------------------|-----------------------|-----------------------|-----------------------|--------------------|
| أثق بشدة | <input type="radio"/> | لا أثق علي الإطلاق |

نشكر تعاونكم وتقبلوا تحيات فريق البحث

(البيانات الشخصية والصحية خاصة بالآباء والأوصياء على الأطفال)

## 42. \* أذكر المحافظة التي تعيش بها

Mark only one oval.

- ☐ الإسكندرية
- ☐ الإسماعيلية
- ☐ أسوان
- ☐ أسيوط
- ☐ الأقصر
- ☐ البحر الأحمر
- ☐ البحيرة
- ☐ بني سويف
- ☐ بورسعيد
- ☐ جنوب سيناء
- ☐ الجيزة
- ☐ الدقهلية
- ☐ دمياط
- ☐ سوهاج
- ☐ السويس
- ☐ الشرقية
- ☐ شمال سيناء
- ☐ الغربية
- ☐ الفيوم
- ☐ القاهرة
- ☐ القليوبية
- ☐ قنا

- ☐ كفر الشيخ
- ☐ مطروح
- ☐ المنوفية
- ☐ المنيا
- ☐ الوادي الجديد

43. \* الجنس/ النوع

Mark only one oval.

- ☐ ذكر
- ☐ أنثى

44. \* العمر

Mark only one oval.

- ☐ عام 18-29
- ☐ سنة 30-39
- ☐ سنة 40-49
- ☐ سنة 50-59
- ☐ أكثر من 60 سنة

## 45. \* صلة القرابة للطفل

*Mark only one oval.*

- ☐ الأم
- ☐ الأب
- ☐ الجد/الجدة
- ☐ العم/ة أو الخال/ة
- ☐ غير ذلك

## 46. \* مستوى التعليم

*Mark only one oval.*

- ☐ أمي لا يقرأ ولا يكتب
- ☐ يقرأ ويكتب
- ☐ ابتدائي
- ☐ اعدادي
- ☐ ثانوي
- ☐ جامعي
- ☐ دراسات عليا

## 47. \* محل العمل

*Mark only one oval.*☐ حكومي☐ خاص☐ لا أعمل

## 48. \* نوع العمل

*Mark only one oval.*☐ أعمل من خلال المنزل☐ (أعمل جزئياً) أذهب إلي العمل 3 أو 4 مرات في الأسبوع☐ أذهب إلي العمل يومياً☐ لا أعمل

## 49. \* هل تعمل بالمجال الصحي؟

*Mark only one oval.*☐ نعم☐ لا

50. \* هل لديك تأمين صحي؟

Mark only one oval.

- ☐ تأمين صحي حكومي
- ☐ تأمين صحي خاص
- ☐ بدون تأمين صحي

51. \* الدخل الشهري

Mark only one oval.

- ☐ لا يكفي ويستدين ولا يستطيع الوفاء بالدين
- ☐ لا يكفي ويستدين ويستطيع الوفاء بالدين
- ☐ يكفي
- ☐ يكفي ويدخر

52. \* هل يعيش أحد الوالدين أو الأقارب من كبار السن معك في نفس المنزل؟

Mark only one oval.

- ☐ نعم
- ☐ لا

53. \* ما هو عدد الأفراد الذين يعيشون بداخل منزلك؟

Mark only one oval.

- ☐ فردين
- ☐ أفراد 3
- ☐ أفراد 4
- ☐ أفراد 5
- ☐ أكثر من 5 أفراد

54. \* هل تأكدت إصابتك بفيروس كورونا-19 من قبل؟

Mark only one oval.

- ☐ نعم
- ☐ لا
- ☐ غير متأكد

55. \* ما هو موقفك من لقاح كورونا-19؟

Mark only one oval.

- ☐ (أرفض تلقي اللقاح (التطعيم)
- ☐ تلقيت الجرعة الأولى وبانتظار الجرعة الثانية
- ☐ تلقيت الجرعة الأولى ولن أتلقى الجرعة الثانية
- ☐ تلقيت الجرعة الأولى والثانية وفي انتظار الجرعة التنشيطية
- ☐ تلقيت الجرعة الأولى والثانية ولن أكمل الجرعة التنشيطية
- ☐ أتممت الجرعات (الأولى والثانية والتنشيطية)
- ☐ أوافق علي تلقي اللقاح وبانتظار تلقي الجرعات

56. \* ما هو سبب عدم استكمال جرعات اللقاح المضاد لفيروس كورونا-19؟

Check all that apply.

- ☐ لأن التطعيم غير متوفر
- ☐ لن استكمل الجرعات
- ☐ لأن ميعاد الجرعة الثانية من اللقاح لم يحن موعده بعد
- ☐ لا ينطبق

Other: ☐ \_\_\_\_\_

57. \* إن كنت تعاني من أمراض مزمنة, حدد تلك الأمراض

Check all that apply.

☐ لا أعاني من أمراض مزمنة

☐ ضغط

☐ سكر

☐ قلب

☐ أمراض صدرية

☐ أمراض في الكلى والكبد

☐ أمراض روماتيزمية ومناعية

☐ أمراض نفسية وعصبية

☐ إعاقة حركية

☐ فقدان جزئي للسمع والبصر

Other: ☐ \_\_\_\_\_

البيانات الخاصة بالطفل الأول

58. \* ما هو عمر الطفل الأول؟

\_\_\_\_\_

59. \* ما هو جنس/نوع الطفل الأول؟

Mark only one oval.

☐ ذكر

☐ انثى

60. \* هل سبق وأن تم تشخيص طفلك الأول بالإصابة بفيروس كورونا-19؟

Mark only one oval.

☐ نعم

☐ لا

☐ غير متأكد

61. \* (هل يعاني طفلك الأول من أي أمراض مزمنة؟ (حدد تلك الأمراض

Check all that apply.

- ☐ لا يعاني أبنائي من أي أمراض مزمنة
- ☐ سكر
- ☐ ضغط
- ☐ قلب
- ☐ أمراض صدرية
- ☐ أمراض الكلى والكبد
- ☐ أمراض روماتيزمية ومناعية
- ☐ أمراض نفسية وعصبية
- ☐ إعاقات حركية
- ☐ فقدان جزئي للسمع أو البصر

62. \* هل تلقى طفلك الأول التطعيمات (اللقاحات) الإلزامية للأطفال من قبل وزارة الصحة المصرية؟

Mark only one oval.

- ☐ نعم
- ☐ لا
- ☐ غير متأكد

63. \* هل تلقى طفلك الأول تطعيم الانفلونزا الموسمية في خلال السنتين الماضيتين؟

Mark only one oval.

☐ نعم

☐ لا

☐ غير متأكد

64. \* ما هو موقفك تجاه تطعيم طفلك بتطعيم (لقاح) الكورونا-19؟

Mark only one oval.

☐ بالفعل تلقى طفلي تطعيم (لقاح) الكورونا-19

☐ أوافق على تطعيم طفلي ولكن تطعيم (لقاح) الكورونا-19 غير متوفر

☐ أرفض تطعيم طفلي بتطعيم (لقاح) كورونا-19

البيانات الخاصة بالطفل الثاني

65. \* ما هو عمر الطفل الثاني؟

---

66. \* ما هو جنس/نوع الطفل الثاني؟

Mark only one oval.

☐ ذكر

☐ انثى

67. \* هل سبق وأن تم تشخيص طفلك الثاني بالإصابة بفيروس كورونا-19؟

Mark only one oval.

☐ نعم

☐ لا

☐ غير متأكد

68. \* (هل يعاني طفلك الثاني من أي أمراض مزمنة؟ (حدد تلك الأمراض

Check all that apply.

- ☐ لا يعاني أبنائي من أي أمراض مزمنة
- ☐ سكر
- ☐ ضغط
- ☐ قلب
- ☐ أمراض صدرية
- ☐ أمراض الكلى والكبد
- ☐ أمراض روماتيزمية ومناعية
- ☐ أمراض نفسية وعصبية
- ☐ إعاقات حركية
- ☐ فقدان جزئي للسمع أو البصر

69. \* هل تلقى طفلك الثاني التطعيمات (اللقاحات) الإلزامية للأطفال من قبل وزارة الصحة المصرية؟

Mark only one oval.

- ☐ نعم
- ☐ لا
- ☐ غير متأكد

70. \* هل تلقى طفلك الثاني تطعيم الانفلونزا الموسمية في خلال السنتين الماضيتين؟

Mark only one oval.

☐ نعم

☐ لا

☐ غير متأكد

71. \* ما هو موقفك تجاه تطعيم طفلك بتطعيم (لقاح) الكورونا-19؟

Mark only one oval.

☐ بالفعل تلقى طفلي تطعيم (لقاح) الكورونا-19

☐ أوافق على تطعيم طفلي ولكن تطعيم (لقاح) الكورونا-19 غير متوفر

☐ أرفض تطعيم طفلي بتطعيم (لقاح) كورونا-19

72. \* إذا أتيح لك الاختيار، هل ترغب في تطعيم أطفالك نوع محدد من اللقاحات المتوفرة ضد فيروس كورونا-19؟

Check all that apply.

- ☐ سينوفارم
- ☐ سينوفاك
- ☐ استرازينيكا
- ☐ سبوتنيك
- ☐ جونسون اند جونسون
- ☐ فايزر
- ☐ مودرنا
- ☐ أرفض تطعيم أطفالي
- ☐ لا أعلم

الرجاء اختيار إجابة واحدة

مقياس اتجاهات الآباء عن التطعيمات لأطفالهم

73. \* هل سبق لك في أي وقت أن أجلت تطعيم طفلك لأسباب غير المرض أو الحساسية؟

Mark only one oval.

- ☐ نعم
- ☐ لا
- ☐ لا أعلم

74. \* هل سبق لك أن قررت الامتناع عن تطعيم طفلك لأسباب غير المرض أو الحساسية؟

Mark only one oval.

- ☐ نعم
- ☐ لا
- ☐ لا أعلم

75. \* إلى أي مدى أنت متأكد أن الالتزام بجرعات التطعيم الموصي بها مفيدة بالنسبة لطفلك

Mark only one oval.

|            | 1                     | 2                     | 3                     | 4                     | 5                     | 6                     | 7                     | 8                     | 9                     | 10                    |                       |
|------------|-----------------------|-----------------------|-----------------------|-----------------------|-----------------------|-----------------------|-----------------------|-----------------------|-----------------------|-----------------------|-----------------------|
| متأكد بشدة | <input type="radio"/> | غير متأكد علي الإطلاق |

76. \* يتلقى الأطفال عدد أكبر من جرعات التطعيم اللازمة لهم

Mark only one oval.

- ☐ أوافق بشدة
- ☐ أوافق
- ☐ غير متأكد
- ☐ لا أوافق
- ☐ لا أوافق بشدة

77. \* أعتقد أن التطعيمات تقي من الأمراض الشديدة

Mark only one oval.

- ☐ أوافق بشدة
- ☐ أوافق
- ☐ غير متأكد
- ☐ لا أوافق
- ☐ لا أوافق بشدة

78. \* من الأفضل لطفلي أن يكتسب مناعة عن طريق الإصابة بالمرض بدلاً من أخذ التطعيم

Mark only one oval.

- ☐ أوافق بشدة
- ☐ أوافق
- ☐ غير متأكد
- ☐ لا أوافق
- ☐ لا أوافق بشدة

79. \* من الأفضل أن يحصل الأطفال على عدد قليل من جرعات التطعيم في نفس الوقت

Mark only one oval.

- ☐ أوافق بشدة
- ☐ أوافق
- ☐ غير متأكد
- ☐ لا أوافق
- ☐ لا أوافق بشدة

80. \* إلى أي مدى تشعر بالقلق من أن يسبب التطعيم عرض جانبي خطير لطفلك؟

Mark only one oval.

- ☐ أنا لست قلق أبدا تجاه ذلك
- ☐ أنا لست قلق تجاه ذلك
- ☐ غير متأكد
- ☐ أنا قلق قليلا تجاه ذلك
- ☐ أنا قلق كثيرا تجاه ذلك

81. \* إلى أي مدى تشعر بالقلق أن تكون إحدى تطعيمات الاطفال غير امنة؟

Mark only one oval.

- ☐ أنا لست قلق أبدا تجاه ذلك
- ☐ أنا لست قلق تجاه ذلك
- ☐ أنا قلق قليلا تجاه ذلك
- ☐ أنا قلق كثيرا تجاه ذلك

82. \* إلى أي مدى تشعر بالقلق أن التطعيم لن يقي من المرض؟

Mark only one oval.

- ☐ أنا لست قلق أبدا تجاه ذلك
- ☐ أنا لست قلق تجاه ذلك
- ☐ غير متأكد
- ☐ أنا قلق قليلا تجاه ذلك
- ☐ أنا قلق كثيرا تجاه ذلك

83. \* إذا رزقت بطفل في الوقت الحالي هل ترغب بأن يتلقى كل التطعيمات الموصى بها؟

Mark only one oval.

☐ نعم

☐ لا

☐ لا أعلم

84. \* عموماً، الى أي درجة تعتبر نفسك متردد بشأن تطعيمات الأطفال؟

Mark only one oval.

☐ لست متردد أبدا

☐ لست متردد

☐ غير متأكد

☐ متردد

☐ متردد جداً

85. \* أثق بالمعلومات التي اتلقاها عن التطعيمات

Mark only one oval.

- ☐ أوافق بشدة
- ☐ أوافق
- ☐ غير متأكد
- ☐ لا أوافق
- ☐ لا أوافق بشدة

86. \* أنا قادر على مناقشة مخاوفي الخاصة بالتطعيم مع طبيب طفلي

Mark only one oval.

- ☐ أوافق بشدة
- ☐ أوافق
- ☐ غير متأكد
- ☐ لا أوافق
- ☐ لا أوافق بشدة

87. \* إجمالاً، إلى أي مدى تثق في طبيب طفلك؟

Mark only one oval.

|          |                       |                       |                       |                       |                       |                       |                       |                       |                       |                       |                    |
|----------|-----------------------|-----------------------|-----------------------|-----------------------|-----------------------|-----------------------|-----------------------|-----------------------|-----------------------|-----------------------|--------------------|
|          | 1                     | 2                     | 3                     | 4                     | 5                     | 6                     | 7                     | 8                     | 9                     | 10                    |                    |
| أثق بشدة | <input type="radio"/> | لا أثق علي الإطلاق |

نشكر تعاونكم وتقبلوا تحيات فريق البحث

(البيانات الشخصية والصحية خاصة بالآباء والأوصياء على الأطفال)

88. \* أذكر المحافظة التي تعيش بها

Mark only one oval.

- ☐ الإسكندرية
- ☐ الإسماعيلية
- ☐ أسوان
- ☐ أسيوط
- ☐ الأقصر
- ☐ البحر الأحمر
- ☐ البحيرة
- ☐ بني سويف
- ☐ بورسعيد
- ☐ جنوب سيناء
- ☐ الجيزة
- ☐ الدقهلية
- ☐ دمياط
- ☐ سوهاج
- ☐ السويس
- ☐ الشرقية
- ☐ شمال سيناء
- ☐ الغربية
- ☐ الفيوم
- ☐ القاهرة
- ☐ القليوبية
- ☐ قنا

- ☐ كفر الشيخ
- ☐ مطروح
- ☐ المنوفية
- ☐ المنيا
- ☐ الوادي الجديد

89. \* الجنس/ النوع

Mark only one oval.

- ☐ ذكر
- ☐ أنثى

90. \* العمر

Mark only one oval.

- ☐ عام 18-29
- ☐ سنة 30-39
- ☐ سنة 40-49
- ☐ سنة 50-59
- ☐ أكثر من 60 سنة

## 91. \* صلة القرابة للطفل

*Mark only one oval.*

- ☐ الأم
- ☐ الأب
- ☐ الجد/الجدة
- ☐ العم/ة أو الخال/ة
- ☐ غير ذلك

## 92. \* مستوى التعليم

*Mark only one oval.*

- ☐ أمي لا يقرأ ولا يكتب
- ☐ يقرأ ويكتب
- ☐ ابتدائي
- ☐ اعدادي
- ☐ ثانوي
- ☐ جامعي
- ☐ دراسات عليا

93. \* محل العمل

Mark only one oval.

☐ حكومي

☐ خاص

☐ لا أعمل

94. \* نوع العمل

Mark only one oval.

☐ أعمل من خلال المنزل

☐ (أعمل جزئياً) أذهب إلي العمل 3 أو 4 مرات في الأسبوع

☐ أذهب إلي العمل يومياً

☐ لا أعمل

95. \* هل تعمل بالمجال الصحي؟

Mark only one oval.

☐ نعم

☐ لا

96. \* هل لديك تأمين صحي؟

Mark only one oval.

- ☐ تأمين صحي حكومي
- ☐ تأمين صحي خاص
- ☐ بدون تأمين صحي

97. \* الدخل الشهري

Mark only one oval.

- ☐ لا يكفي ويستدين ولا يستطيع الوفاء بالدين
- ☐ لا يكفي ويستدين ويستطيع الوفاء بالدين
- ☐ يكفي
- ☐ يكفي ويدخر

98. \* هل يعيش أحد الوالدين أو الأقارب من كبار السن معك في نفس المنزل؟

Mark only one oval.

- ☐ نعم
- ☐ لا

99. \* ما هو عدد الأفراد الذين يعيشون بداخل منزلك؟

Mark only one oval.

- ☐ فردين
- ☐ 3 أفراد
- ☐ 4 أفراد
- ☐ 5 أفراد
- ☐ أكثر من 5 أفراد

100. \* هل تأكدت إصابتك بفيروس كورونا-19 من قبل؟

Mark only one oval.

- ☐ نعم
- ☐ لا
- ☐ غير متأكد

101. \* ما هو موقفك من لقاح كورونا-19؟

Mark only one oval.

- ☐ (أرفض تلقي اللقاح (التطعيم)
- ☐ تلقيت الجرعة الأولى وبانتظار الجرعة الثانية
- ☐ تلقيت الجرعة الأولى ولن أتلقى الجرعة الثانية
- ☐ تلقيت الجرعة الأولى والثانية وفي انتظار الجرعة التنشيطية
- ☐ تلقيت الجرعة الأولى والثانية ولن أكمل الجرعة التنشيطية
- ☐ أتممت الجرعات (الأولى والثانية والتنشيطية)
- ☐ أوافق علي تلقي اللقاح وبانتظار تلقي الجرعات

102. \* ما هو سبب عدم استكمال جرعات اللقاح المضاد لفيروس كورونا-19؟

Check all that apply.

- ☐ لأن التطعيم غير متوفر
- ☐ لن استكمل الجرعات
- ☐ لأن ميعاد الجرعة الثانية من اللقاح لم يحن موعده بعد
- ☐ لا ينطبق

Other: ☐ \_\_\_\_\_

103. \* إن كنت تعاني من أمراض مزمنة, حدد تلك الأمراض

Check all that apply.

- ☐ لا أعاني من أمراض مزمنة
- ☐ ضغط
- ☐ سكر
- ☐ قلب
- ☐ أمراض صدرية
- ☐ أمراض في الكلى والكبد
- ☐ أمراض روماتيزمية ومناعية
- ☐ أمراض نفسية وعصبية
- ☐ إعاقة حركية
- ☐ فقدان جزئي للسمع والبصر

Other: ☐ \_\_\_\_\_

البيانات الخاصة بالطفل الأول

104. \* ما هو عمر الطفل الأول؟

\_\_\_\_\_

105. \* ما هو جنس/نوع الطفل الأول؟

Mark only one oval.

☐ ذكر

☐ انثى

106. \* هل سبق وأن تم تشخيص طفلك الأول بالإصابة بفيروس كورونا-19؟

Mark only one oval.

☐ نعم

☐ لا

☐ غير متأكد

107. \* (هل يعاني طفلك الأول من أي أمراض مزمنة؟ (حدد تلك الأمراض

*Check all that apply.*

- ☐ لا يعاني أبني من أي أمراض مزمنة
- ☐ سكر
- ☐ ضغط
- ☐ قلب
- ☐ أمراض صدرية
- ☐ أمراض الكلى والكبد
- ☐ أمراض روماتيزمية ومناعية
- ☐ أمراض نفسية وعصبية
- ☐ إعاقات حركية
- ☐ فقدان جزئي للسمع أو البصر

108. \* هل تلقى طفلك الأول التطعيمات (اللقاحات) الإجبارية للأطفال من قبل وزارة الصحة المصرية؟

*Mark only one oval.*

- ☐ نعم
- ☐ لا
- ☐ غير متأكد

109. \* هل تلقى طفلك الأول تطعيم الانفلونزا الموسمية في خلال السنتين الماضيتين؟

Mark only one oval.

☐ نعم

☐ لا

☐ غير متأكد

110. \* ما هو موقفك تجاه تطعيم طفلك بتطعيم (لقاح) الكورونا-19؟

Mark only one oval.

☐ بالفعل تلقى طفلي تطعيم (لقاح) الكورونا-19

☐ أوافق على تطعيم طفلي ولكن تطعيم (لقاح) الكورونا-19 غير متوفر

☐ أرفض تطعيم طفلي بتطعيم (لقاح) كورونا-19

البيانات الخاصة بالطفل الثاني

111. \* ما هو عمر الطفل الثاني؟

---

112. \* ما هو جنس/نوع الطفل الثاني؟

Mark only one oval.

☐ ذكر

☐ انثى

113. \* هل سبق وأن تم تشخيص طفلك الثاني بالإصابة بفيروس كورونا-19؟

Mark only one oval.

☐ نعم

☐ لا

☐ غير متأكد

114. \* (هل يعاني طفلك الثاني من أي أمراض مزمنة؟ (حدد تلك الأمراض

Check all that apply.

- ☐ لا يعاني أبني من أي أمراض مزمنة
- ☐ سكر
- ☐ ضغط
- ☐ قلب
- ☐ أمراض صدرية
- ☐ أمراض الكلى والكبد
- ☐ أمراض روماتيزمية ومناعية
- ☐ أمراض نفسية وعصبية
- ☐ إعاقات حركية
- ☐ فقدان جزئي للسمع أو البصر

115. \* هل تلقى طفلك الثاني التطعيمات (اللقاحات) الإجبارية للأطفال من قبل وزارة الصحة المصرية؟

Mark only one oval.

- ☐ نعم
- ☐ لا
- ☐ غير متأكد

116. \* هل تلقى طفلك الثاني تطعيم الانفلونزا الموسمية في خلال السنتين الماضيتين؟

Mark only one oval.

☐ نعم

☐ لا

☐ غير متأكد

117. \* ما هو موقفك تجاه تطعيم طفلك بتطعيم (لقاح) الكورونا-19؟

Mark only one oval.

☐ بالفعل تلقى طفلي تطعيم (لقاح) الكورونا-19

☐ أوافق على تطعيم طفلي ولكن تطعيم (لقاح) الكورونا-19 غير متوفر

☐ أرفض تطعيم طفلي بتطعيم (لقاح) كورونا-19

البيانات الخاصة بالطفل الثالث

118. \* ما هو عمر الطفل الثالث؟

---

119. \* ما هو جنس/نوع الطفل الثالث؟

Mark only one oval.

☐ ذكر

☐ انثى

120. \* هل سبق وأن تم تشخيص طفلك الثالث بالإصابة بفيروس كورونا-19؟

Mark only one oval.

☐ نعم

☐ لا

☐ غير متأكد

121. \* (هل يعاني طفلك الثالث من أي أمراض مزمنة؟ (حدد تلك الأمراض

Check all that apply.

- ☐ لا يعاني أبني من أي أمراض مزمنة
- ☐ سكر
- ☐ ضغط
- ☐ قلب
- ☐ أمراض صدرية
- ☐ أمراض الكلى والكبد
- ☐ أمراض روماتيزمية ومناعية
- ☐ أمراض نفسية وعصبية
- ☐ إعاقات حركية
- ☐ فقدان جزئي للسمع أو البصر

122. \* هل تلقى طفلك الثالث التطعيمات (اللقاحات) الإجبارية للأطفال من قبل وزارة الصحة المصرية؟

Mark only one oval.

- ☐ نعم
- ☐ لا
- ☐ غير متأكد

123. \* هل تلقى طفلك الثالث تطعيم الانفلونزا الموسمية في خلال السنتين الماضيتين؟

Mark only one oval.

☐ نعم

☐ لا

☐ غير متأكد

124. \* ما هو موقفك تجاه تطعيم طفلك بتطعيم (لقاح) الكورونا-19؟

Mark only one oval.

☐ بالفعل تلقى طفلي تطعيم (لقاح) الكورونا-19

☐ أوافق على تطعيم طفلي ولكن تطعيم (لقاح) الكورونا-19 غير متوفر

☐ أرفض تطعيم طفلي بتطعيم (لقاح) كورونا-19

125. \* إذا أتيح لك الاختيار ، هل ترغب في تطعيم أطفالك نوع محدد من اللقاحات المتوفرة ضد فيروس كورونا-19؟

Check all that apply.

- ☐ سينوفارم
- ☐ سينوفاك
- ☐ استرازينيكا
- ☐ سبوتنيك
- ☐ جونسون اند جونسون
- ☐ فايزر
- ☐ مودرنا
- ☐ أرفض تطعيم أطفالتي
- ☐ لا أعلم

الرجاء اختيار إجابة واحدة

مقياس اتجاهات الآباء عن التطعيمات لأطفالهم

126. \* هل سبق لك في أي وقت أن أجلت تطعيم طفلك لأسباب غير المرض أو الحساسية؟

Mark only one oval.

- ☐ نعم
- ☐ لا
- ☐ لا أعلم

127. \* هل سبق لك أن قررت الامتناع عن تطعيم طفلك لأسباب غير المرض أو الحساسية؟

Mark only one oval.

- ☐ نعم
- ☐ لا
- ☐ لا أعلم

128. \* إلى أي مدى أنت متأكد أن الالتزام بجرعات التطعيم الموصي بها مفيدة بالنسبة لطفلك

Mark only one oval.

|            | 1                     | 2                     | 3                     | 4                     | 5                     | 6                     | 7                     | 8                     | 9                     | 10                    |                       |
|------------|-----------------------|-----------------------|-----------------------|-----------------------|-----------------------|-----------------------|-----------------------|-----------------------|-----------------------|-----------------------|-----------------------|
| متأكد بشدة | <input type="radio"/> | غير متأكد علي الإطلاق |

129. \* يتلقى الأطفال عدد أكبر من جرعات التطعيم اللازمة لهم

Mark only one oval.

- ☐ أوافق بشدة
- ☐ أوافق
- ☐ غير متأكد
- ☐ لا أوافق
- ☐ لا أوافق بشدة

130. \* أعتقد أن التطعيمات تقي من الأمراض الشديدة

Mark only one oval.

- ☐ أوافق بشدة
- ☐ أوافق
- ☐ غير متأكد
- ☐ لا أوافق
- ☐ لا أوافق بشدة

131. \* من الأفضل لطفلي أن يكتسب مناعة عن طريق الإصابة بالمرض بدلاً من أخذ التطعيم

Mark only one oval.

- ☐ أوافق بشدة
- ☐ أوافق
- ☐ غير متأكد
- ☐ لا أوافق
- ☐ لا أوافق بشدة

132. \* من الأفضل أن يحصل الأطفال على عدد قليل من جرعات التطعيم في نفس الوقت

Mark only one oval.

- ☐ أوافق بشدة
- ☐ أوافق
- ☐ غير متأكد
- ☐ لا أوافق
- ☐ لا أوافق بشدة

133. \* إلى أي مدى تشعر بالقلق من أن يسبب التطعيم عرض جانبي خطير لطفلك؟

Mark only one oval.

- ☐ أنا لست قلق أبدا تجاه ذلك
- ☐ أنا لست قلق تجاه ذلك
- ☐ غير متأكد
- ☐ أنا قلق قليلا تجاه ذلك
- ☐ أنا قلق كثيرا تجاه ذلك

134. \* إلى أي مدى تشعر بالقلق أن تكون إحدى تطعيمات الاطفال غير امنة؟

Mark only one oval.

☐ أنا لست قلق أبدا تجاه ذلك

☐ أنا لست قلق تجاه ذلك

☐ أنا قلق قليلا تجاه ذلك

☐ أنا قلق كثيرا تجاه ذلك

135. \* إلى أي مدى تشعر بالقلق أن التطعيم لن يقي من المرض؟

Mark only one oval.

☐ أنا لست قلق أبدا تجاه ذلك

☐ أنا لست قلق تجاه ذلك

☐ غير متأكد

☐ أنا قلق قليلا تجاه ذلك

☐ أنا قلق كثيرا تجاه ذلك

136. \* إذا رزقت بطفل في الوقت الحالي هل ترغب بأن يتلقى كل التطعيمات الموصى بها؟

Mark only one oval.

- ☐ نعم
- ☐ لا
- ☐ لا أعلم

137. \* عموماً، الى أي درجة تعتبر نفسك متردد بشأن تطعيمات الأطفال؟

Mark only one oval.

- ☐ لست متردد أبدا
- ☐ لست متردد
- ☐ غير متأكد
- ☐ متردد
- ☐ متردد جدا

138. \* أثق بالمعلومات التي اتلقاها عن التطعيمات

Mark only one oval.

- ☐ أوافق بشدة
- ☐ أوافق
- ☐ غير متأكد
- ☐ لا أوافق
- ☐ لا أوافق بشدة

139. \* أنا قادر على مناقشة مخاوفي الخاصة بالتطعيم مع طبيب طفلي

Mark only one oval.

- ☐ أوافق بشدة
- ☐ أوافق
- ☐ غير متأكد
- ☐ لا أوافق
- ☐ لا أوافق بشدة

140. \* إجمالاً، الى أي مدى تثق في طبيب طفلك؟

Mark only one oval.

|                    |                       |                       |                       |                       |                       |                       |                       |                       |                       |                       |          |
|--------------------|-----------------------|-----------------------|-----------------------|-----------------------|-----------------------|-----------------------|-----------------------|-----------------------|-----------------------|-----------------------|----------|
|                    | 1                     | 2                     | 3                     | 4                     | 5                     | 6                     | 7                     | 8                     | 9                     | 10                    |          |
| لا أثق علي الإطلاق | <input type="radio"/> | أثق بشدة |

نشكر تعاونكم وتقبلوا تحيات فريق البحث

(البيانات الشخصية والصحية خاصة بالآباء والأوصياء على الأطفال)

## 141. \* أذكر المحافظة التي تعيش بها

Mark only one oval.

☐ الإسكندرية

☐ الإسماعيلية

☐ أسوان

☐ أسيوط

☐ الأقصر

☐ البحر الأحمر

☐ البحيرة

☐ بني سويف

☐ بورسعيد

☐ جنوب سيناء

☐ الجيزة

☐ الدقهلية

☐ دمياط

☐ سوهاج

☐ السويس

☐ الشرقية

☐ شمال سيناء

☐ الغربية

☐ الفيوم

☐ القاهرة

☐ القليوبية

☐ قنا

- ☐ كفر الشيخ
- ☐ مطروح
- ☐ المنوفية
- ☐ المنيا
- ☐ الوادي الجديد

142. \* الجنس/ النوع

*Mark only one oval.*

- ☐ ذكر
- ☐ أنثى

143. \* العمر

*Mark only one oval.*

- ☐ عام 18-29
- ☐ سنة 30-39
- ☐ سنة 40-49
- ☐ سنة 50-59
- ☐ أكثر من 60 سنة

## 144. \* صلة القرابة للطفل

Mark only one oval.

- ☐ الأم
- ☐ الأب
- ☐ الجد/الجدة
- ☐ العم/ة أو الخال/ة
- ☐ غير ذلك

## 145. \* مستوى التعليم

Mark only one oval.

- ☐ أمي لا يقرأ ولا يكتب
- ☐ يقرأ ويكتب
- ☐ ابتدائي
- ☐ اعدادي
- ☐ ثانوي
- ☐ جامعي
- ☐ دراسات عليا

146. \* محل العمل

Mark only one oval.

☐ حكومي

☐ خاص

☐ لا أعمل

147. \* نوع العمل

Mark only one oval.

☐ أعمل من خلال المنزل

☐ (أعمل جزئياً) أذهب الي العمل 3 أو 4 مرات في الأسبوع

☐ أذهب إلي العمل يومياً

☐ لا أعمل

148. \* هل تعمل بالمجال الصحي؟

Mark only one oval.

☐ نعم

☐ لا

149. \* هل لديك تأمين صحي؟

Mark only one oval.

☐ تأمين صحي حكومي

☐ تأمين صحي خاص

☐ بدون تأمين صحي

150. \* الدخل الشهري

Mark only one oval.

☐ لا يكفي ويستدين ولا يستطيع الوفاء بالدين

☐ لا يكفي ويستدين ويستطيع الوفاء بالدين

☐ يكفي

☐ يكفي ويدخر

151. \* هل يعيش أحد الوالدين أو الأقارب من كبار السن معك في نفس المنزل؟

Mark only one oval.

☐ نعم

☐ لا

152. \* ما هو عدد الأفراد الذين يعيشون بداخل منزلك؟

Mark only one oval.

- ☐ فردين
- ☐ أفراد 3
- ☐ أفراد 4
- ☐ أفراد 5
- ☐ أكثر من 5 أفراد

153. \* هل تأكدت إصابتك بفيروس كورونا-19 من قبل؟

Mark only one oval.

- ☐ نعم
- ☐ لا
- ☐ غير متأكد

154. \* ما هو موقفك من لقاح كورونا-19؟

Mark only one oval.

- ☐ (أرفض تلقي اللقاح (التطعيم)
- ☐ تلقيت الجرعة الأولى وبانتظار الجرعة الثانية
- ☐ تلقيت الجرعة الأولى ولن أتلقى الجرعة الثانية
- ☐ تلقيت الجرعة الأولى والثانية وفي انتظار الجرعة التنشيطية
- ☐ تلقيت الجرعة الأولى والثانية ولن أكمل الجرعة التنشيطية
- ☐ أتممت الجرعات (الأولى والثانية والتنشيطية)
- ☐ أوافق علي تلقي اللقاح وبانتظار تلقي الجرعات

155. \* ما هو سبب عدم استكمال جرعات اللقاح المضاد لفيروس كورونا-19؟

Check all that apply.

- ☐ لأن التطعيم غير متوفر
- ☐ لن استكمل الجرعات
- ☐ لأن ميعاد الجرعة الثانية من اللقاح لم يحن موعده بعد
- ☐ لا ينطبق

Other: ☐ \_\_\_\_\_

156. \* إن كنت تعاني من أمراض مزمنة, حدد تلك الأمراض

Check all that apply.

- ☐ لا أعاني من أمراض مزمنة
- ☐ ضغط
- ☐ سكر
- ☐ قلب
- ☐ أمراض صدرية
- ☐ أمراض في الكلى والكبد
- ☐ أمراض روماتيزمية ومناعية
- ☐ أمراض نفسية وعصبية
- ☐ إعاقة حركية
- ☐ فقدان جزئي للسمع والبصر

Other: ☐ \_\_\_\_\_

البيانات الخاصة بالطفل الأول

157. \* ما هو عمر الطفل الأول؟

\_\_\_\_\_

158. \* ما هو جنس/نوع الطفل الأول؟

Mark only one oval.

☐ ذكر

☐ انثى

159. \* هل سبق وأن تم تشخيص طفلك الأول بالإصابة بفيروس كورونا-19؟

Mark only one oval.

☐ نعم

☐ لا

☐ غير متأكد

160. \* (هل يعاني طفلك الأول من أي أمراض مزمنة؟ (حدد تلك الأمراض

Check all that apply.

- ☐ لا يعاني أبني من أي أمراض مزمنة
- ☐ سكر
- ☐ ضغط
- ☐ قلب
- ☐ أمراض صدرية
- ☐ أمراض الكلى والكبد
- ☐ أمراض روماتيزمية ومناعية
- ☐ أمراض نفسية وعصبية
- ☐ إعاقات حركية
- ☐ فقدان جزئي للسمع أو البصر

161. \* هل تلقى طفلك الأول التطعيمات (اللقاحات) الإجبارية للأطفال من قبل وزارة الصحة المصرية؟

Mark only one oval.

- ☐ نعم
- ☐ لا
- ☐ غير متأكد

162. \* هل تلقى طفلك الأول تطعيم الانفلونزا الموسمية في خلال السنتين الماضيتين؟

Mark only one oval.

☐ نعم

☐ لا

☐ غير متأكد

163. \* ما هو موقفك تجاه تطعيم طفلك بتطعيم (لقاح) الكورونا-19؟

Mark only one oval.

☐ بالفعل تلقى طفلي تطعيم (لقاح) الكورونا-19

☐ أوافق على تطعيم طفلي ولكن تطعيم (لقاح) الكورونا-19 غير متوفر

☐ أرفض تطعيم طفلي بتطعيم (لقاح) كورونا-19

البيانات الخاصة بالطفل الثاني

164. \* ما هو عمر الطفل الثاني؟

---

165. \* ما هو جنس/نوع الطفل الثاني؟

Mark only one oval.

☐ ذكر

☐ انثى

166. \* هل سبق وأن تم تشخيص طفلك الثاني بالإصابة بفيروس كورونا-19؟

Mark only one oval.

☐ نعم

☐ لا

☐ غير متأكد

167. \* (هل يعاني طفلك الثاني من أي أمراض مزمنة؟ (حدد تلك الأمراض

Check all that apply.

- ☐ لا يعاني أبني من أي أمراض مزمنة
- ☐ سكر
- ☐ ضغط
- ☐ قلب
- ☐ أمراض صدرية
- ☐ أمراض الكلى والكبد
- ☐ أمراض روماتيزمية ومناعية
- ☐ أمراض نفسية وعصبية
- ☐ إعاقات حركية
- ☐ فقدان جزئي للسمع أو البصر

168. \* هل تلقى طفلك الثاني التطعيمات (اللقاحات) الإجبارية للأطفال من قبل وزارة الصحة المصرية؟

Mark only one oval.

- ☐ نعم
- ☐ لا
- ☐ غير متأكد

169. \* هل تلقى طفلك الثاني تطعيم الانفلونزا الموسمية في خلال السنتين الماضيتين؟

Mark only one oval.

☐ نعم

☐ لا

☐ غير متأكد

170. \* ما هو موقفك تجاه تطعيم طفلك بتطعيم (لقاح) الكورونا-19؟

Mark only one oval.

☐ بالفعل تلقى طفلي تطعيم (لقاح) الكورونا-19

☐ أوافق على تطعيم طفلي ولكن تطعيم (لقاح) الكورونا-19 غير متوفر

☐ أرفض تطعيم طفلي بتطعيم (لقاح) كورونا-19

البيانات الخاصة بالطفل الثالث

171. \* ما هو عمر الطفل الثالث؟

---

172. \* ما هو جنس/نوع الطفل الثالث؟

Mark only one oval.

☐ ذكر

☐ انثى

173. \* هل سبق وأن تم تشخيص طفلك الثالث بالإصابة بفيروس كورونا-19؟

Mark only one oval.

☐ نعم

☐ لا

☐ غير متأكد

174. \* (هل يعاني طفلك الثالث من أي أمراض مزمنة؟ (حدد تلك الأمراض

Check all that apply.

- ☐ لا يعاني أبني من أي أمراض مزمنة
- ☐ سكر
- ☐ ضغط
- ☐ قلب
- ☐ أمراض صدرية
- ☐ أمراض الكلى والكبد
- ☐ أمراض روماتيزمية ومناعية
- ☐ أمراض نفسية وعصبية
- ☐ إعاقات حركية
- ☐ فقدان جزئي للسمع أو البصر

175. \* هل تلقى طفلك الثالث التطعيمات (اللقاحات) الإجبارية للأطفال من قبل وزارة الصحة المصرية؟

Mark only one oval.

- ☐ نعم
- ☐ لا
- ☐ غير متأكد

176. \* هل تلقى طفلك الثالث تطعيم الانفلونزا الموسمية في خلال السنتين الماضيتين؟

Mark only one oval.

☐ نعم

☐ لا

☐ غير متأكد

177. \* ما هو موقفك تجاه تطعيم طفلك بتطعيم (لقاح) الكورونا-19؟

Mark only one oval.

☐ بالفعل تلقى طفلي تطعيم (لقاح) الكورونا-19

☐ أوافق على تطعيم طفلي ولكن تطعيم (لقاح) الكورونا-19 غير متوفر

☐ أرفض تطعيم طفلي بتطعيم (لقاح) كورونا-19

البيانات الخاصة بالطفل الرابع

178. \* ما هو عمر الطفل الرابع؟

---

179. \* ما هو جنس/نوع الطفل الرابع؟

Mark only one oval.

☐ ذكر

☐ انثى

180. \* هل سبق وأن تم تشخيص طفلك الرابع بالإصابة بفيروس كورونا-19؟

Mark only one oval.

☐ نعم

☐ لا

☐ غير متأكد

181. \* (هل يعاني طفلك الرابع من أي أمراض مزمنة؟ (حدد تلك الأمراض

Check all that apply.

- ☐ لا يعاني أبني من أي أمراض مزمنة
- ☐ سكر
- ☐ ضغط
- ☐ قلب
- ☐ أمراض صدرية
- ☐ أمراض الكلى والكبد
- ☐ أمراض روماتيزمية ومناعية
- ☐ أمراض نفسية وعصبية
- ☐ إعاقات حركية
- ☐ فقدان جزئي للسمع أو البصر

182. \* هل تلقى طفلك الرابع التطعيمات (اللقاحات) الإجبارية للأطفال من قبل وزارة الصحة المصرية؟

Mark only one oval.

- ☐ نعم
- ☐ لا
- ☐ غير متأكد

183. \* هل تلقى طفلك الرابع تطعيم الانفلونزا الموسمية في خلال السنتين الماضيتين؟

Mark only one oval.

☐ نعم

☐ لا

☐ غير متأكد

184. \* ما هو موقفك تجاه تطعيم طفلك بتطعيم (لقاح) الكورونا-19؟

Mark only one oval.

☐ بالفعل تلقى طفلي تطعيم (لقاح) الكورونا-19

☐ أوافق على تطعيم طفلي ولكن تطعيم (لقاح) الكورونا-19 غير متوفر

☐ أرفض تطعيم طفلي بتطعيم (لقاح) كورونا-19

185. \* إذا أُتيح لك الاختيار ، هل ترغب في تطعيم أطفالك نوع محدد من اللقاحات المتوفرة ضد فيروس كورونا-19؟

Check all that apply.

- ☐ سينوفارم
- ☐ سينوفاك
- ☐ استرازينيكا
- ☐ سبوتنيك
- ☐ جونسون اند جونسون
- ☐ فايزر
- ☐ مودرنا
- ☐ أرفض تطعيم أطفالتي
- ☐ لا أعلم

الرجاء اختيار إجابة واحدة

مقياس اتجاهات الآباء عن التطعيمات لأطفالهم

186. \* هل سبق لك في أي وقت أن أجلت تطعيم طفلك لأسباب غير المرض أو الحساسية؟

Mark only one oval.

- ☐ نعم
- ☐ لا
- ☐ لا أعلم

187. \* هل سبق لك أن قررت الامتناع عن تطعيم طفلك لأسباب غير المرض أو الحساسية؟

Mark only one oval.

- ☐ نعم
- ☐ لا
- ☐ لا أعلم

188. \* إلى أي مدى أنت متأكد أن الالتزام بجرعات التطعيم الموصي بها مفيدة بالنسبة لطفلك

Mark only one oval.

|            | 1                     | 2                     | 3                     | 4                     | 5                     | 6                     | 7                     | 8                     | 9                     | 10                    |                       |
|------------|-----------------------|-----------------------|-----------------------|-----------------------|-----------------------|-----------------------|-----------------------|-----------------------|-----------------------|-----------------------|-----------------------|
| متأكد بشدة | <input type="radio"/> | غير متأكد علي الإطلاق |

189. \* يتلقى الأطفال عدد أكبر من جرعات التطعيم اللازمة لهم

Mark only one oval.

- ☐ أوافق بشدة
- ☐ أوافق
- ☐ غير متأكد
- ☐ لا أوافق
- ☐ لا أوافق بشدة

190. \* أعتقد أن التطعيمات تقي من الأمراض الشديدة

Mark only one oval.

- ☐ أوافق بشدة
- ☐ أوافق
- ☐ غير متأكد
- ☐ لا أوافق
- ☐ لا أوافق بشدة

191. \* من الأفضل لطفلي أن يكتسب مناعة عن طريق الإصابة بالمرض بدلاً من أخذ التطعيم

Mark only one oval.

- ☐ أوافق بشدة
- ☐ أوافق
- ☐ غير متأكد
- ☐ لا أوافق
- ☐ لا أوافق بشدة

192. \* من الأفضل أن يحصل الأطفال على عدد قليل من جرعات التطعيم في نفس الوقت

Mark only one oval.

- ☐ أوافق بشدة
- ☐ أوافق
- ☐ غير متأكد
- ☐ لا أوافق
- ☐ لا أوافق بشدة

193. \* إلى أي مدى تشعر بالقلق من أن يسبب التطعيم عرض جانبي خطير لطفلك؟

Mark only one oval.

- ☐ أنا لست قلق أبدا تجاه ذلك
- ☐ أنا لست قلق تجاه ذلك
- ☐ غير متأكد
- ☐ أنا قلق قليلا تجاه ذلك
- ☐ أنا قلق كثيرا تجاه ذلك

194. \* إلى أي مدى تشعر بالقلق أن تكون إحدى تطعيمات الاطفال غير امنة؟

Mark only one oval.

☐ أنا لست قلق أبدا تجاه ذلك

☐ أنا لست قلق تجاه ذلك

☐ أنا قلق قليلا تجاه ذلك

☐ أنا قلق كثيرا تجاه ذلك

195. \* إلى أي مدى تشعر بالقلق أن التطعيم لن يقي من المرض؟

Mark only one oval.

☐ أنا لست قلق أبدا تجاه ذلك

☐ أنا لست قلق تجاه ذلك

☐ غير متأكد

☐ أنا قلق قليلا تجاه ذلك

☐ أنا قلق كثيرا تجاه ذلك

196. \* إذا رزقت بطفل في الوقت الحالي هل ترغب بأن يتلقى كل التطعيمات الموصى بها؟

Mark only one oval.

- ☐ نعم
- ☐ لا
- ☐ لا أعلم

197. \* عموماً، الى أي درجة تعتبر نفسك متردد بشأن تطعيمات الأطفال؟

Mark only one oval.

- ☐ لست متردد أبدا
- ☐ لست متردد
- ☐ غير متأكد
- ☐ متردد
- ☐ متردد جداً

198. \* أثق بالمعلومات التي اتلقاها عن التطعيمات

Mark only one oval.

- ☐ أوافق بشدة
- ☐ أوافق
- ☐ غير متأكد
- ☐ لا أوافق
- ☐ لا أوافق بشدة

199. \* أنا قادر على مناقشة مخاوفي الخاصة بالتطعيم مع طبيب طفلي

Mark only one oval.

- ☐ أوافق بشدة
- ☐ أوافق
- ☐ غير متأكد
- ☐ لا أوافق
- ☐ لا أوافق بشدة

200. \* إجمالاً، الى أي مدى تثق في طبيب طفلك؟

Mark only one oval.

|                    |                       |                       |                       |                       |                       |                       |                       |                       |                       |          |
|--------------------|-----------------------|-----------------------|-----------------------|-----------------------|-----------------------|-----------------------|-----------------------|-----------------------|-----------------------|----------|
| 1                  | 2                     | 3                     | 4                     | 5                     | 6                     | 7                     | 8                     | 9                     | 10                    |          |
| لا أثق علي الإطلاق | <input type="radio"/> | أثق بشدة |

نشكر تعاونكم وتقبلوا تحيات فريق البحث

This content is neither created nor endorsed by Google.

Google Forms
